# Supplementary material for: Horseradish peroxidase-catalyzed hydrogelation consuming enzyme-produced hydrogen peroxide in the presence of reducing sugars
Source: Royal Society of Chemistry journal article supplement (doi:10.1039/c8sm01839a), 2019-01-01
Supplement: c8sm01839a1.pdf [file c8sm01839a1.pdf]

## Electronic Supplementary Information (ESI)

# **Horseradish peroxidase-catalyzed hydrogelation consuming enzyme-produced hydrogen peroxide in the presence of reducing sugars**

*Enkhtuul Gantumur, Shinji Sakai\*, Masaki Nakahata and Masahito Taya*

Division of Chemical Engineering, Department of Materials Engineering Science, Graduate School of  
Engineering Science, Osaka University, 1-3 Machikaneyama-cho, Toyonaka, Osaka 560-8531, Japan

Corresponding Author

\* E-mail: [sakai@cheng.es.osaka-u.ac.jp](mailto:sakai@cheng.es.osaka-u.ac.jp)

## 1. Estimation of sugar reducing power

*Reagent preparation:* Copper sulfate ( $\text{CuSO}_4 \cdot 5\text{H}_2\text{O}$ , 15g) was dissolved in 100 mL distilled water (Somogyi's reagent A). Anhydrous sodium carbonate ( $\text{Na}_2\text{CO}_3$ , 2.5 g), Rochelle salt ( $\text{COOKCHOH} \cdot \text{CHOHCOONa} \cdot 4 \text{H}_2\text{O}$ , 2.5 g), sodium bicarbonate ( $\text{NaHCO}_3$ , 2.0 g) and anhydrous sodium sulfate ( $\text{Na}_2\text{SO}_4$ , 2.0 g) were dissolved in 100 mL distilled water (Somogyi's reagent B). Somogyi's reagent A (1 mL) and B (24 mL) were mixed right before use (Somogyi's reagent C). Ammonium molybdate ( $(\text{NH}_4)_6\text{Mo}_7\text{O}_{24} \cdot 4\text{H}_2\text{O}$ , 5 g) was dissolved in 80 mL distilled water. Then, sulfuric acid (Conc.  $\text{H}_2\text{SO}_4$ , 4.2 mL) was added slowly. Thereafter, sodium arsenate ( $\text{Na}_2\text{HAsO}_4 \cdot 7\text{H}_2\text{O}$ , 0.6 g in 5 mL distilled water) was added and the total volume was fixed at 100 mL (Nelson's reagent). The resultant mixture stored in a brown bottle at 37°C. Glucose, galactose and mannose were dissolved in distilled water.

*Procedure:* Different concentrations of each reducing sugars (0-176  $\mu\text{g/mL}$ ) were added in test tubes and made up to 1 mL. Somogyi's reagent C (1 mL) was added to each tube, and the tubes were kept for 20 min in a boiling water bath. After cooling the tubes to room temperature, Nelson's reagent (1 mL) was added with gentle mixing and rested at 37°C for 5 min. Then, the absorbance at 660 nm was measured.

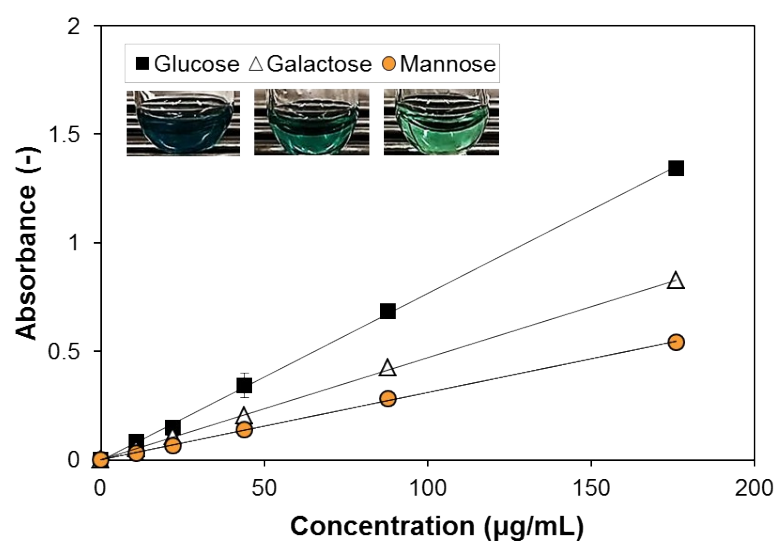

**Fig. S1** Calibration curves of reducing sugars determined by the Somogyi-Nelson method. The data are mean values ( $n=3$ ) with their standard deviations. Photographs in the graph show the color differences of reaction solutions at 88  $\mu\text{g/mL}$ .

## 2. Harvesting cell sheets

After optimal culture times, hydrogels were treated with medium containing hyaluronidase (FUJIFILM Wako Pure Chemical Corporation, Osaka, Japan, 100 units/mL). Detached cell sheets were transferred to fresh cell culture dishes and incubated at 37°C.

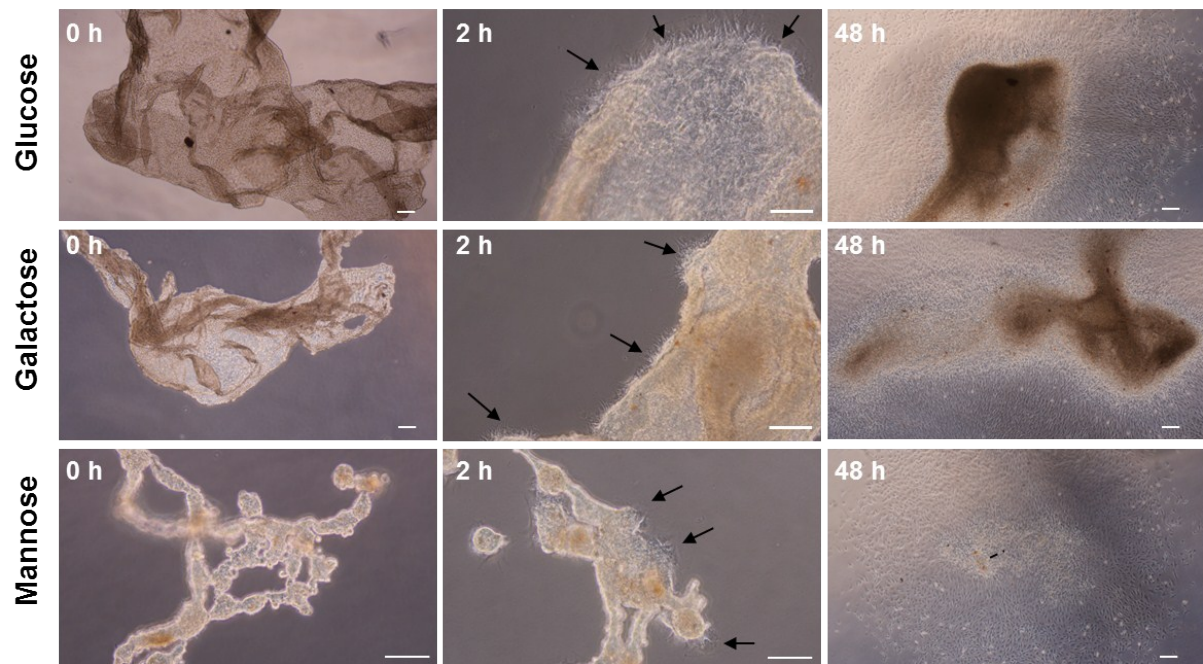

**Fig. S2** Photographs of 10T1/2 cell-layers detached from hydrogels after transfer to fresh cell culture dishes. Scale bars: 200  $\mu$ m. Arrows in photographs indicate cell attachments to culture dishes.

### 3. Effect of HRP concentration on mechanical property of HA-Ph hydrogel

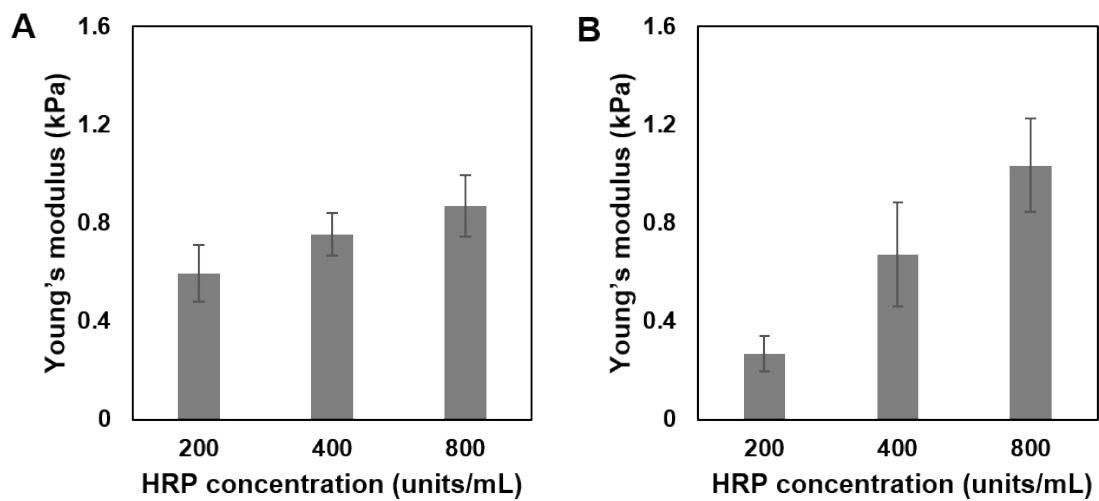

**Fig. S3** Effects of HRP concentrations on Young's modulus of the resultant hydrogels obtained from HA-Ph (0.75 w/v%) and (A) galactose (44 mg/mL), or (B) mannose (44 mg/mL). The data are mean values ( $n=4$ ) with their standard deviations.

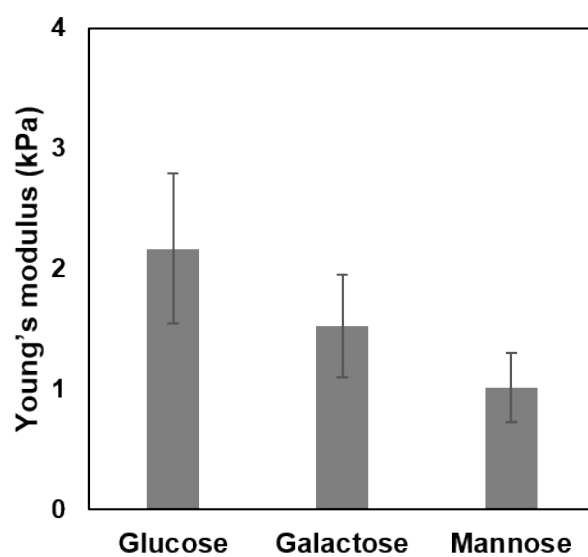

#### 4. Effect of sugar type on mechanical property of HA-Ph + Gelatin-Ph hydrogel

**Fig. S4** Effects of sugar type on Young's modulus of the resultant hydrogels obtained from HA-Ph (0.75 w/v%), gelatin-Ph (0.3 w/v%), HRP (800 units/mL) and reducing sugars (88 mg/mL).

The data are mean values ( $n=4$ ) with their standard deviations.
